# Supplementary material
Source: Springer Nature journal article supplement (https://www.springermedizin.de/resource/supplementary/12974_2013_847_MOESM1_ESM.pdf/9600300)
Supplement: MOESM1 [file 9600300]

Supplementary information Fig. 1

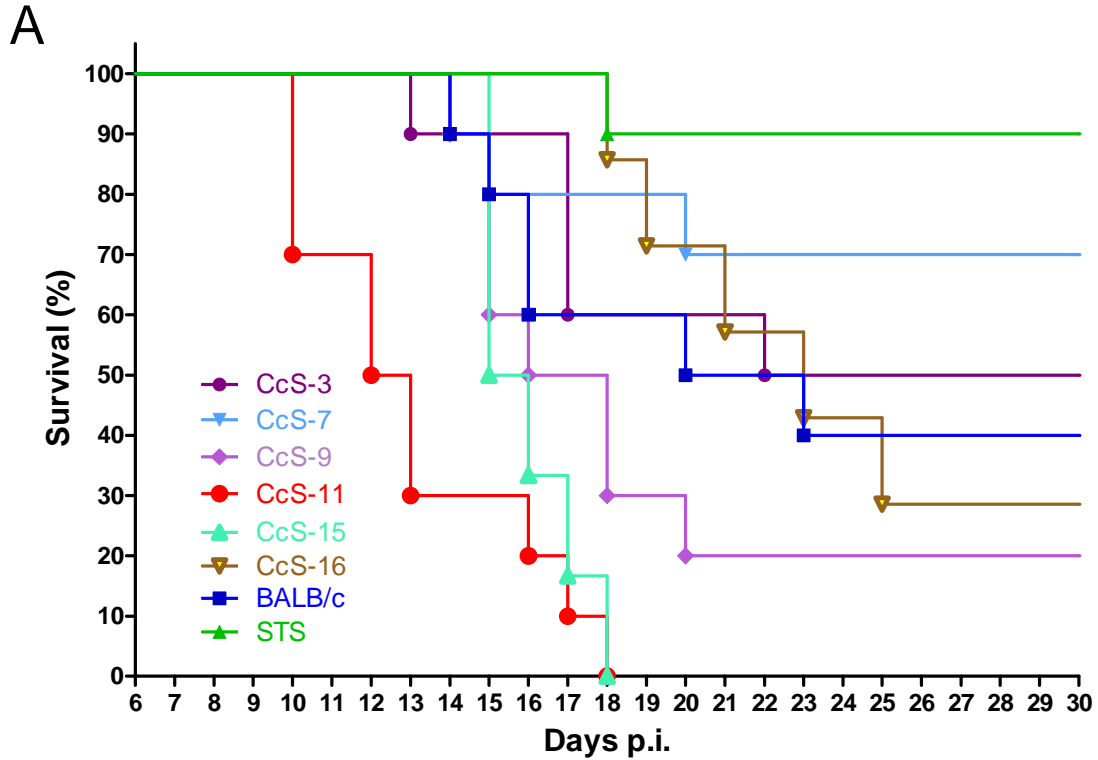

**B**

| Strain                      | CcS-3 | CcS-7 | CcS-9 | CcS-11 | CcS-15 | CcS-16 | BALB/c | STS  |
|-----------------------------|-------|-------|-------|--------|--------|--------|--------|------|
| Median survival time [days] | 24,1  | 26,6  | 19,3  | 13,1   | 16,0   | 24,0   | 22,8   | 29,7 |
| Standart deviation [days]   | ±7,6  | ±7,2  | ±6,4  | ±3,0   | ±1,3   | ±5,3   | ±7,5   | ±4,1 |
| n survived / n              | 5/10  | 7/10  | 2/10  | 0/10   | 0/6    | 2/7    | 4/10   | 9/10 |

Supplementary Figure 1. **Differential survival of BALB/c, STS and selected RC strains after subcutaneous inoculation of TBEV.** Mice were inoculated with  $10^4$  pfu of TBEV and observed for lethality.

Supplementary information Fig. 2

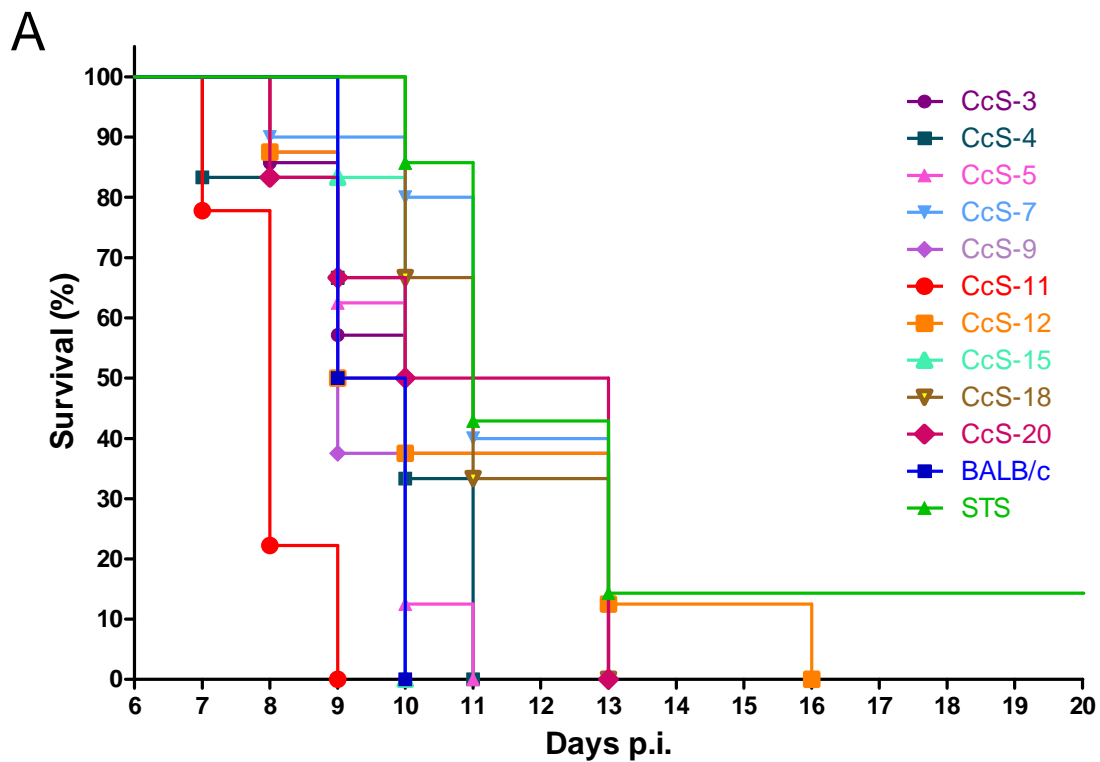

**B**

| Strain                      | CcS-3 | CcS-4 | CcS-5 | CcS-7 | CcS-9 | CcS-11 | CcS-12 | CcS-15 | CcS-18 | CcS-20 | BALB/c | STS  |
|-----------------------------|-------|-------|-------|-------|-------|--------|--------|--------|--------|--------|--------|------|
| Median survival time [days] | 9,4   | 9,7   | 9,8   | 11,4  | 10,4  | 8,0    | 10,9   | 9,8    | 11,3   | 11,0   | 9,5    | 12,4 |
| Standart deviation [days]   | ±0,8  | ±1,5  | ±0,7  | ±1,6  | ±2,2  | ±0,7   | ±2,8   | ±0,4   | ±1,4   | ±2,3   | ±0,5   | ±2,7 |
| n survived / n              | 0/7   | 0/6   | 0/8   | 0/10  | 0/8   | 0/9    | 0/8    | 0/6    | 0/6    | 0/6    | 0/8    | 1/7  |

Supplementary Figure 2. **Differential survival of BALB/c, STS and selected RC strains after intracerebral inoculation of TBEV.** Mice were inoculated with 10 pfu of TBEV and observed for lethality.
